# Supplementary material for: A genome-wide transcriptional analysis of morphology determination in Candida albicans
Source: PubMed Central journal article supplement — Mol Biol Cell. 2013 Feb 1;24(3):246–60. doi: 10.1091/mbc.E12-01-0065 (PMC3564527; doi:10.1091/mbc.e12-01-0065), 2013-02-01
Supplement: supp_E12-01-0065v1_Binder1.pdf [file supp_E12-01-0065v1_Binder1.pdf]

## SUPPLEMENTAL MATERIAL

**Table S1.** Relative morphological distribution of genes induced by *UME6* during the yeast-pseudohyphal-hyphal transition (time course experiment).

**Table S2.** Primers used in this study.

### Supplemental Reference.

**Figure S1.** Cell images of pseudohyphal populations. Aliquots of cells from the 0.1  $\mu\text{g}/\text{mL}$  Dox concentration of the *UME6* steady state culture (dosage) experiment (A) or – Dox 3 hr. time point of the forward yeast-pseudohyphal-hyphal transition time course experiment (B) were fixed in 4.5% formaldehyde, washed twice in 1X PBS and visualized using DIC microscopy. Bar = 10  $\mu\text{m}$ .

**Figure S2.** Large cluster diagrams of genes showing expression changes in the *UME6* steady state culture (dosage) and forward transition time course experiments. (A) Cluster diagram of all genes showing  $\geq 2$ -fold change in expression in at least one data point of the *UME6* steady state culture (dosage) experiment with greater than 80% of data present. Each data point represents fold change in gene expression relative to the 20  $\mu\text{g}/\text{mL}$  Dox culture. (B) Cluster diagram of all genes showing  $\geq 2$ -fold change in expression in at least one data point of the forward transition time course experiment with greater than 80% of data present. Each data point represents fold change in gene expression relative to the 0 hr. time point. For both (A) and (B), data represents mean expression values based on two independent DNA microarray experiments ( $n=2$  biological replicates). Blue, increased expression; yellow, reduced expression; gray, no data.

**Figure S3.** Similar gene classes are represented in the sets of genes induced in pseudohyphae and hyphae generated by *UME6* expression levels in a steady state culture. Genes induced in hyphae at least 2-fold in response to constitutive high-level *UME6* expression in the absence of Dox (as defined in Table 1 and described in Dataset S1) and genes induced in pseudohyphae at least 2-fold in response to intermediate levels of *UME6* expression in the presence of 0.1  $\mu\text{g}/\text{mL}$  Dox (as defined in Table 1 and described in Dataset S2) were categorized by biological process and represented as a percentage of the entire hyphal-induced and pseudohyphal-induced gene sets, respectively. The GO Slim Mapper tool, available at the *Candida* Genome Database, was used to classify genes based on process ontology.

**Figure S4.** Similar gene classes are represented in the sets of genes induced in pseudohyphae and hyphae generated by *UME6* expression over a time course. Genes induced in hyphae at least 2-fold at the 10 hr. time point in the absence of Dox relative to the 0 hr. time point (as defined in Table S1 and listed in Dataset S3) and genes induced in pseudohyphae at least 2-fold at the 3 hr. time point in the absence of Dox relative to the 0 hr. time point (as defined in Table S1 and listed in Dataset S4) were categorized by biological process and represented as a percentage of the entire hyphal-induced and pseudohyphal-induced gene sets, respectively. The GO Slim Mapper tool, available at the *Candida* Genome Database, was used to classify genes based on process ontology.

**Figure S5.** Correlation of gene expression values obtained using DNA microarray versus real time quantitative RT-PCR data for the reverse hyphal-pseudohyphal-yeast transition time course. For each gene, graphs represent mean change in gene expression (n=2) as determined by DNA microarray (x-coordinate) plotted against mean gene expression changes (n=3) determined using real time quantitative RT-PCR (y-coordinate) (values in log<sub>2</sub>). Pearson's Correlation Coefficient (r-value) was determined for each graph and statistical significance was determined using the Student's t-test ( $p \leq 0.01$ ).

**Figure S6.** Representation of gene classes in the sets of genes showing reduced expression in pseudohyphae and yeast as *C. albicans* undergoes the reverse hyphal-pseudohyphal-yeast transition. Genes reduced in yeast at least 2-fold at the 10 hr. time point in the presence of Dox, relative to the 0 hr. time point (as defined in Table 3 and described in Dataset S5) and genes reduced in pseudohyphae at least 2-fold at the 3 hr. time point in the presence of Dox, relative to the 0 hr. time point (as defined in Table 3 and described in Dataset S6), were categorized by biological process and represented as a percentage of the entire yeast-reduced and pseudohyphal-reduced gene sets, respectively. The GO Slim Mapper tool, available at the *Candida* Genome Database, was used to classify genes based on process ontology.

**Figure S7.** Gene classes overrepresented, compared to their representation in the genome as a whole, in the set of genes showing reduced expression as *C. albicans* undergoes the reverse hyphal-pseudohyphal-yeast transition in response to depletion of *UME6*. This histogram represents a continuation of the histogram shown in Figure 7. Only data for gene classes that represent < 7% of the gene set as a whole are shown.

**Dataset S1.** Genes induced in hyphae generated by constitutive high-level *UME6* expression in a steady state culture. All genes show a > 2-fold mean induction (n=2) in the absence vs. presence of 20 µg/mL Dox and are defined as described in Table 1.

**Dataset S2.** Genes induced in pseudohyphae generated by constitutive intermediate-level *UME6* expression in a steady state culture. All genes show a > 2-fold mean induction (n=2) in the presence of 0.1 µg/mL vs. 20 µg/mL Dox and are defined in Table 1.

**Dataset S3.** Genes induced in hyphae generated by *UME6* expression over a time course. All genes show a mean induction > 2-fold at the 10 hr. time point in the absence of Dox relative to the 0 hr. time point (n=2) as defined in Table S1.

**Dataset S4.** Genes induced in pseudohyphae generated by *UME6* expression over a time course. All genes show a mean induction > 2-fold at the 3 hr. time point in the absence of Dox relative to the 0 hr. time point (n=2) as defined in Table S1.

**Dataset S5.** Genes showing reduced expression in yeast as *C. albicans* undergoes the reverse hyphal-pseudohyphal-yeast transition in response to *UME6* depletion over a time course. All genes show a mean reduction > 2-fold at the 10 hr. time point in the presence of Dox relative to the 0 hr. time point (n=2) as defined in Table 3.

**Dataset S6.** Genes showing reduced expression in pseudohyphae as *C. albicans* undergoes the reverse hyphal-pseudohyphal-yeast transition in response to *UME6* depletion over a time course. All genes show a mean reduction > 2-fold at the 3 hr. time point in the presence of Dox relative to the 0 hr. time point (n=2) as defined in Table 3.

**Dataset S7.** Complete set of gene expression values for the forward yeast-pseudohyphal-hyphal transition in response to *UME6* dosage in a steady state culture.

**Dataset S8.** Complete set of gene expression values for the forward yeast-pseudohyphal-hyphal transition in response to *UME6* expression over a time course.

**Dataset S9.** Complete set of gene expression values for the reverse hyphal-pseudohyphal-yeast transition in response to *UME6* depletion over a time course.

**Dataset S10.** Complete set of gene expression values for the *tetR-HAP4* control strain grown in the absence vs. presence of 20 µg/mL Dox.

**Dataset S11.** Genes showing reduced expression in hyphae generated by constitutive high-level *UME6* expression in a steady state culture. All genes show a > 2-fold mean reduction (n=2) and are reduced at least 2-fold in two independent experiments (n=2) in the absence vs. presence of 20 µg/mL Dox.

**Dataset S12.** Genes showing reduced expression in hyphae generated by *UME6* expression over a time course. All genes show a mean reduction > 2-fold (n=2) and are reduced at least 2-fold in two independent experiments (n=2) at the 10 hr. time point in the absence of Dox relative to the 0 hr. time point. Data excludes genes showing at least 2-fold reduced expression in two independent experiments (n=2) at the 10 hr. time point + 20 µg/mL Dox relative to the 0 hr. time point.

**Dataset S13.** Genes induced in yeast as *C. albicans* undergoes the reverse hyphal-pseudohyphal-yeast transition in response to *UME6* depletion over a time course. All genes show a mean induction > 2-fold (n=2) and at least 2-fold induction in two independent experiments (n=2) at the 10 hr. time point in the presence of Dox relative to the 0 hr. time point. Data excludes genes showing at least 2-fold induced expression in two independent experiments (n=2) at the 10 hr. time point in the absence of Dox relative to the 0 hr. time point.

**Dataset S14.** Genes showing reduced expression in pseudohyphae generated by constitutive intermediate-level *UME6* expression in a steady state culture. All genes show a > 2-fold mean reduction (n=2) and at least 2-fold reduced expression in two independent experiments (n=2) in 0.1 µg/mL vs. 20 µg/mL Dox.

**Dataset S15.** Genes showing reduced expression in pseudohyphae generated by *UME6* expression over a time course. All genes show a mean reduction > 2-fold (n=2) and at least 2-fold reduced expression in two independent experiments (n=2) at the 3 hr. time point in the absence of Dox relative to the 0 hr. time point. Data excludes genes showing at least 2-fold reduced

expression in two independent experiments (n=2) at the 3 hr. time point + 20  $\mu\text{g}/\text{mL}$  Dox relative to the 0 hr. time point.

**Table S1.** Relative morphological distribution of genes induced by *UME6* during the yeast-pseudohyphal-hyphal transition (time course experiment).

|                                                                 | Fold change relative to yeast expression |          |           |
|-----------------------------------------------------------------|------------------------------------------|----------|-----------|
|                                                                 | > 3-fold                                 | > 4-fold | > 10-fold |
| # of genes up in hyphal cells*                                  | 163                                      | 104      | 33        |
| % of genes also up > 2-fold in pseudohyphal cells <sup>†</sup>  | 15%                                      | 20%      | 27%       |
| % of genes also up > 4-fold in pseudohyphal cells <sup>§</sup>  | 8%                                       | 12%      | 18%       |
| % of genes also up > 10-fold in pseudohyphal cells <sup>§</sup> | 2%                                       | 4%       | 9%        |
|                                                                 | > 2-fold                                 | > 3-fold | > 4-fold  |
| # of genes up in pseudohyphal cells*                            | 44                                       | 27       | 15        |
| % of genes also up >2-fold in hyphal cells <sup>†</sup>         | 84%                                      | 100%     | 100%      |
| % of genes also up >4-fold in hyphal cells <sup>§</sup>         | 68%                                      | 89%      | 93%       |
| % of genes also up >10-fold in hyphal cells <sup>§</sup>        | 34%                                      | 48%      | 47%       |

\* Fold changes are based on mean gene expression values from two independent experiments (n=2). All genes were induced at least 2-fold in both experiments.

<sup>†</sup> Percentage of genes showing an induction of at least 2-fold in two independent experiments (n=2) in the indicated cell morphology.

<sup>§</sup> Percentage of genes showing the indicated mean fold induction in the indicated morphology based on two independent experiments (n=2). All genes were induced at least 2-fold in both experiments.

Data excludes genes with expression values affected in a control strain by Dox alone (as determined by the *tetR-HAP4* control experiment) and genes induced at least 2-fold in two independent experiments (n=2) in the *tetO-UME6* strain time course control culture (for genes up in pseudohyphal cells, control sample is 3 hour time point +Dox; for genes up in hyphal cells, control sample is 10 hour time point +Dox). The *tetO-UME6* strain was grown overnight in YEPD + 1 µg/mL Dox at 30°C to OD<sub>600</sub> ~ 0.5, cells were washed 1X with YEPD, diluted into prewarmed YEPD –Dox at 30°C and grown over a 10 hour time course. Yeast cells = 0 hr. time point prior to removal of Dox, pseudohyphal cells = 3 hr. time point and hyphal cells = 10 hr. time point.

**Table S2****Primers used in this study**

| #  | Primer Name | Sequence                | Description                       |
|----|-------------|-------------------------|-----------------------------------|
| 1  | DT085       | TTGCTCCAGAAGAACATCCAG   | 5' <i>ACT1</i> primer for RT-qPCR |
| 2  | DT086       | AGTAACACCATCACCAGAATCC  | 3' <i>ACT1</i> primer for RT-qPCR |
| 3  | DT0167      | GAACAATGGTGGTGGTAGTGG   | 5' <i>UME6</i> primer for RT-qPCR |
| 4  | DT0168      | AATTCGACAAATCCAACATCC   | 3' <i>UME6</i> primer for RT-qPCR |
| 5  | PC091       | GATTGCTCGGCTATTTCTGC    | 5' <i>PHR1</i> primer for RT-qPCR |
| 6  | PC092       | CTTCCACCAGAGGAAGATGC    | 3' <i>PHR1</i> primer for RT-qPCR |
| 7  | PC094       | GGTTCTGGCTCTCAAACCTGG   | 5' <i>HYR1</i> primer for RT-qPCR |
| 8  | PC095       | CCTGAACCTTCGTTTGATCC    | 3' <i>HYR1</i> primer for RT-qPCR |
| 9  | PC096       | CCAGAAATTGTTGCTCGTGTTG* | 5' <i>ECE1</i> primer for RT-qPCR |
| 10 | PC097       | CAGGACGCCATCAAAAACG*    | 3' <i>ECE1</i> primer for RT-qPCR |
| 11 | PC0106      | GTATCGCTGGTTCTCGTGC     | 5' <i>HGC1</i> primer for RT-qPCR |
| 12 | PC0107      | GACTCCACTCATAACACTACC   | 3' <i>HGC1</i> primer for RT-qPCR |
| 13 | PC0108      | CTCCAGCCACTGAAACACC     | 5' <i>HWP1</i> primer for RT-qPCR |
| 14 | PC0109      | TCCATAGGTGGAATGGAAGC    | 3' <i>HWP1</i> primer for RT-qPCR |

\*Primer sequences obtained from Cleary *et al.*, 2010 (1).

## Supplemental Reference

1. Cleary IA, Mulabagal P, Reinhard SM, Yadev NP, Murdoch, C, et al. (2010) Pseudohyphal regulation by the transcription factor Rfg1p in *Candida albicans*. Eukaryot. Cell 9:1363-1373.

**A**

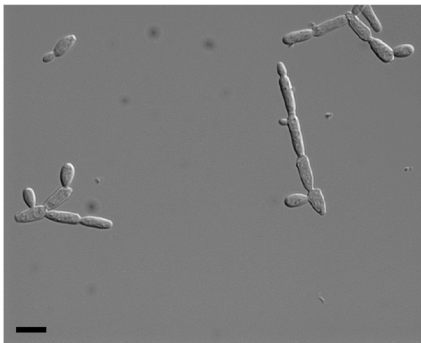

**B**

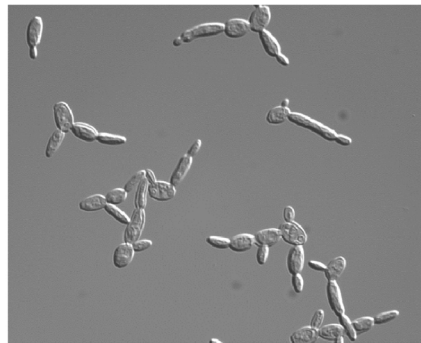

**Figure S1**



**A**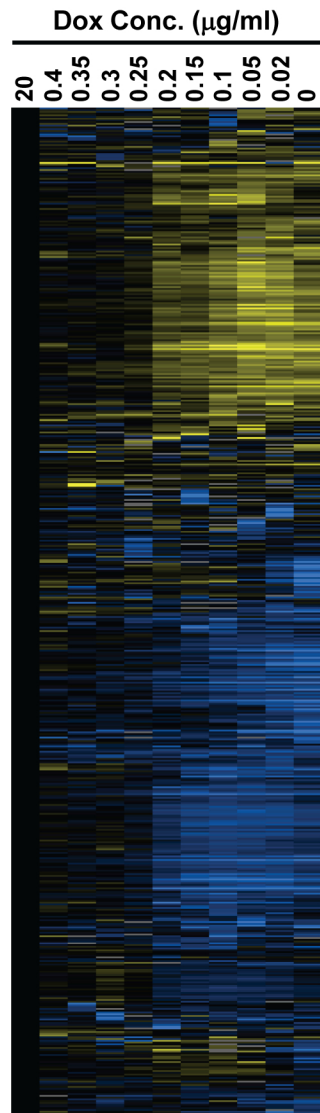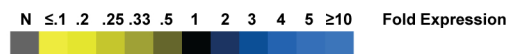**B**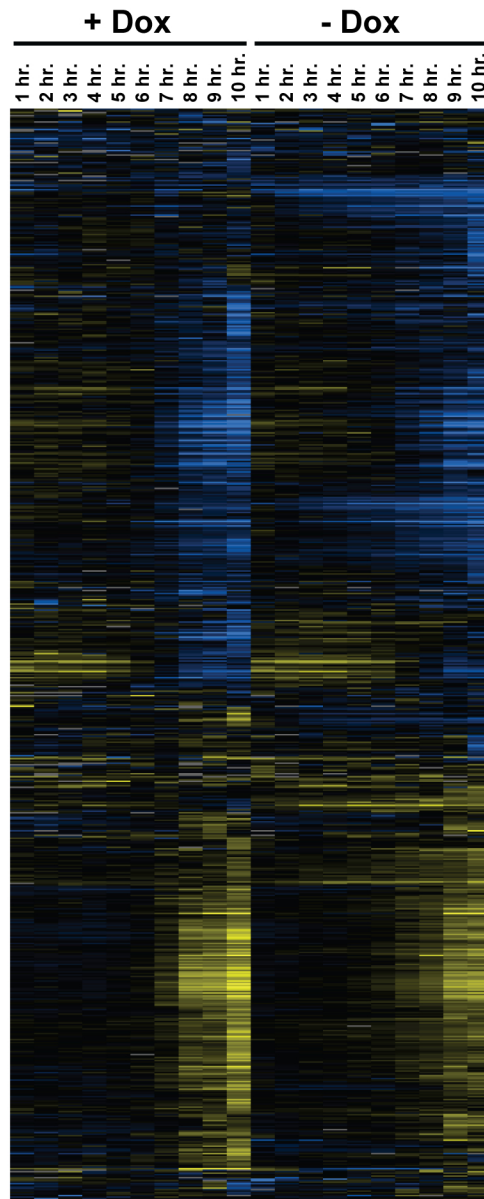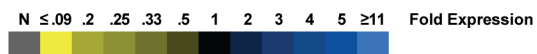**Figure S2**

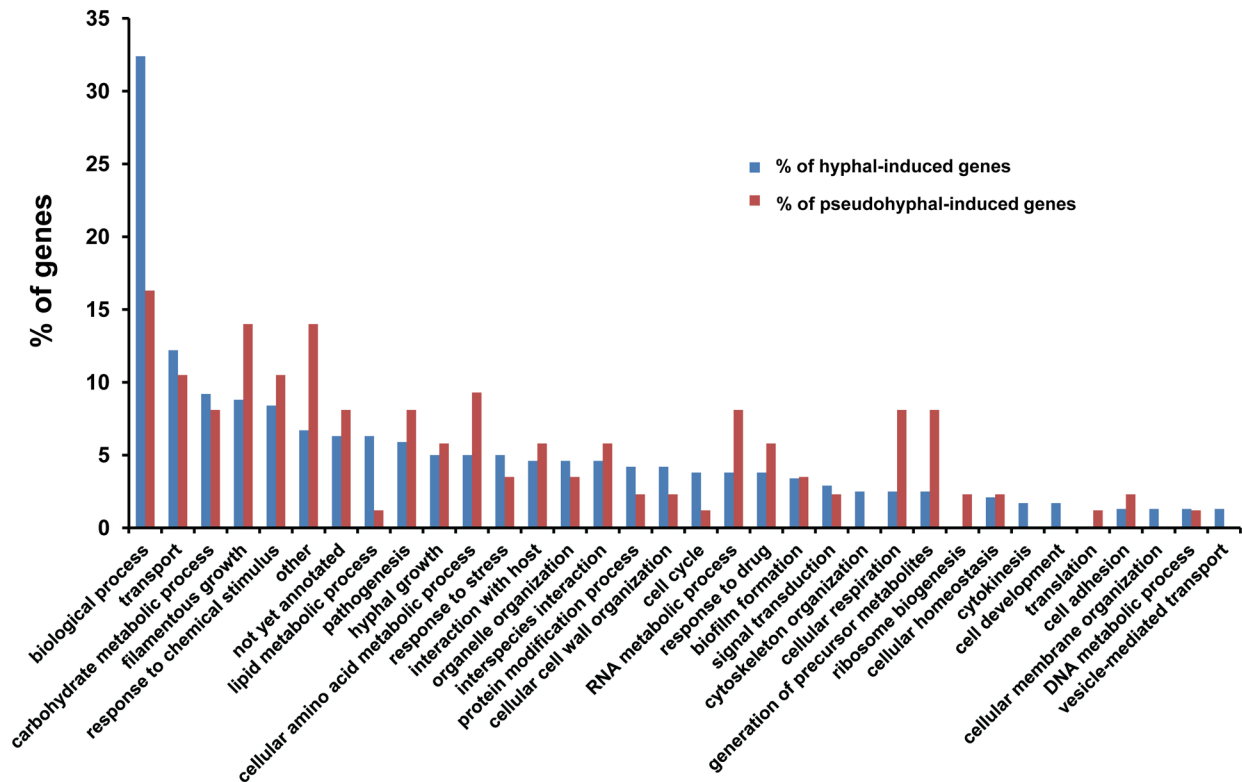

**Figure S3**

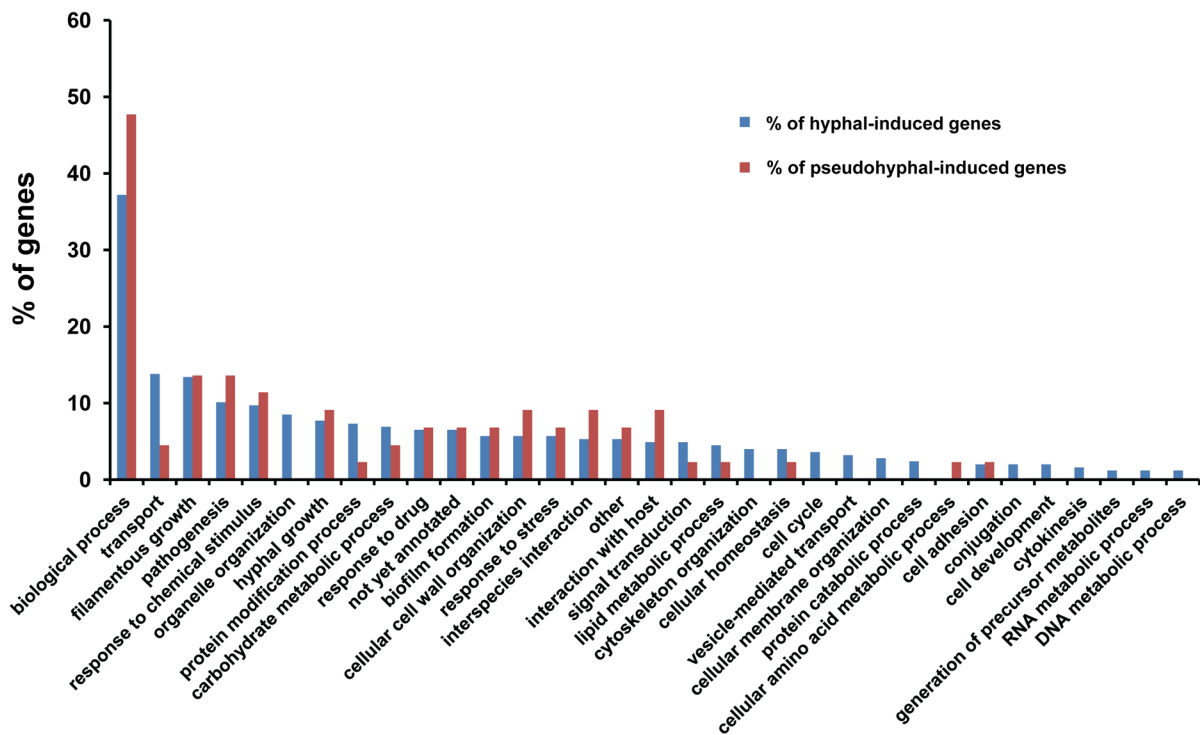

**Figure S4**

**UME6**

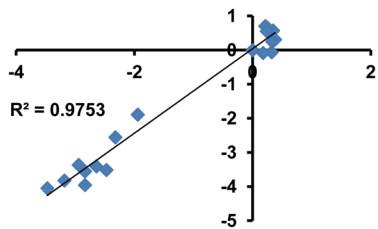

**HGC1**

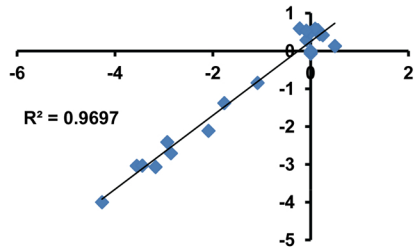

**ECE1**

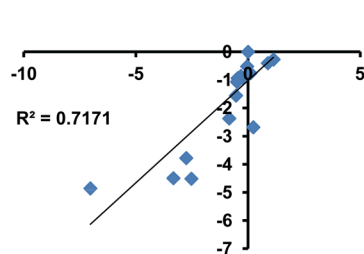

**HWP1**

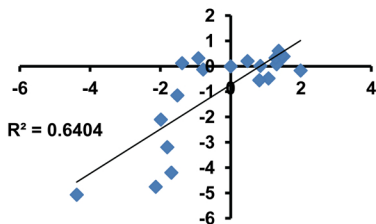

**PHR1**

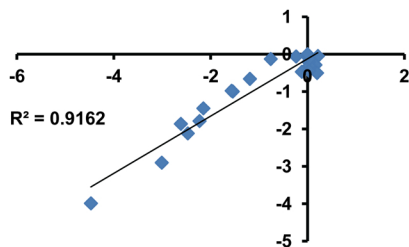

**Figure S5**

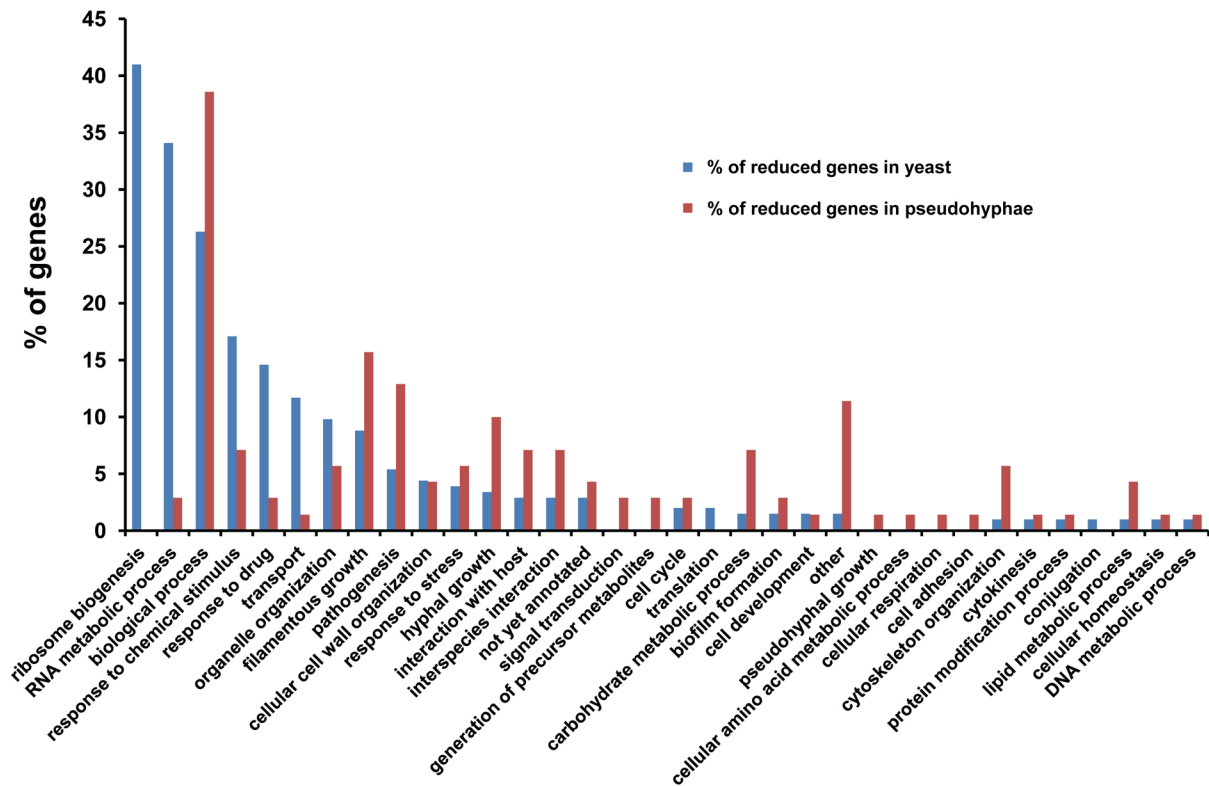

**Figure S6**

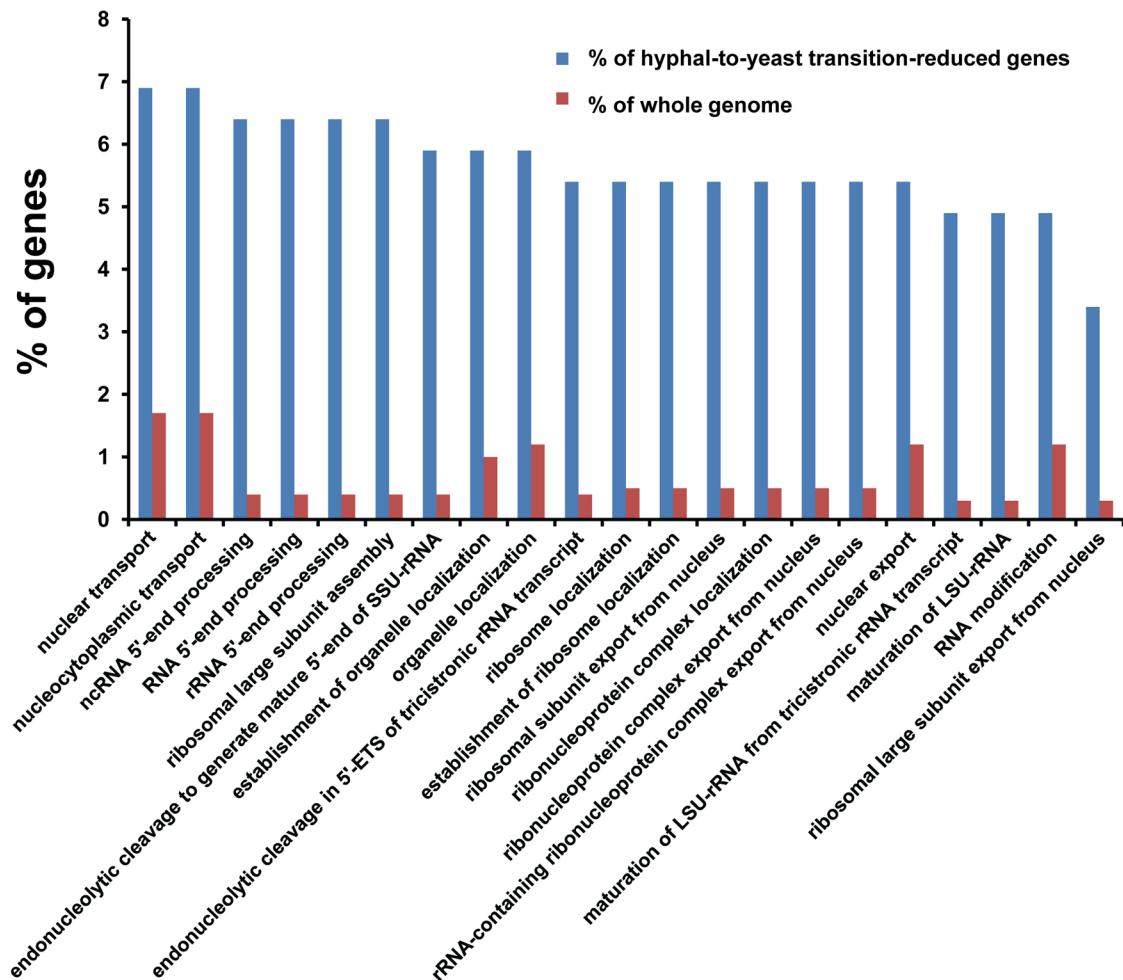

**Figure S7**
